# Supplementary material for: Tracing the anticancer compound [RuII(η6-p-cymene)(8-oxyquinolinato)Cl] in a biological environment by mass spectrometric methods
Source: Royal Society of Chemistry journal article supplement (doi:10.1039/d0ay02311f), 2021-01-01
Supplement: d0ay02311f1.pdf [file d0ay02311f1.pdf]

1 **Supporting Information**

2

3 **to**

4

5 **Tracing the Anticancer Compound [Ru<sup>II</sup>( $\eta^6$ -*p*-cymene)(8-**  
6 **oxyquinolinato)Cl] in Biological Environment by Mass Spectrometric**  
7 **Methods**

8

9 Ena Yano (1), Mie Riisom (1), Kelvin K. H. Tong (1,2), Muhammad Hanif (1,2),  
10 Euphemia Leung (2, 3), Christian G. Hartinger\* (1,2)  
11 *(1): School of Chemical Sciences, University of Auckland, Science Centre Building 302,*  
12 *23 Symonds Street, Auckland 1010, New Zealand*  
13 *(2): Maurice Wilkins Centre, University of Auckland, Private Bag 92019, Auckland*  
14 *1142, New Zealand*  
15 *(3): Auckland Cancer Society Research Centre, University of Auckland, Auckland 1010,*  
16 *New Zealand*

17

18

19 **Table of Contents**

20 Additional LC-UV/vis and LC-MS data

21

22

23

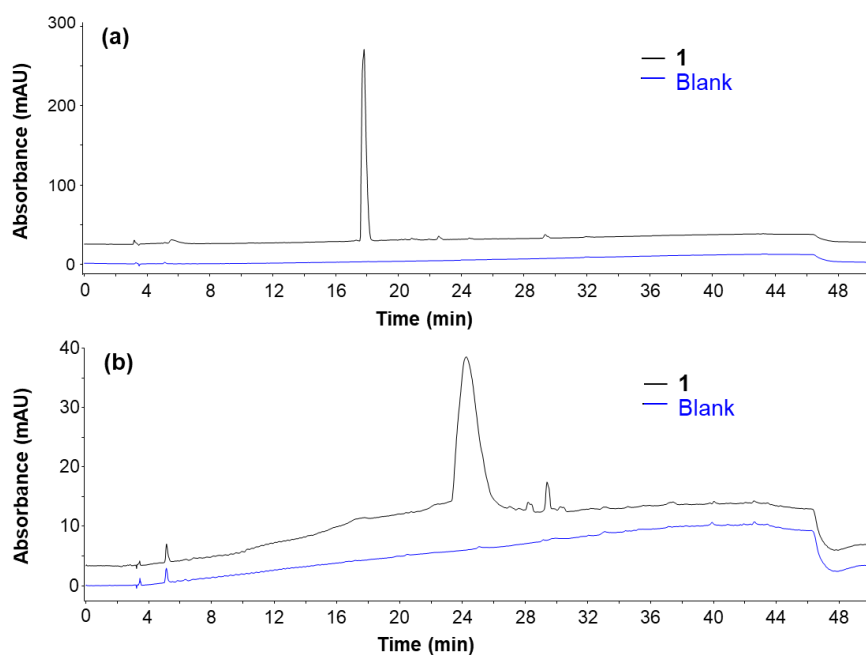

24

25 **Figure S1.** Chromatograms for **1** dissolved in MeOH (25  $\mu$ M) and of a blank were  
26 recorded on a Hypersil GOLD column using a mobile phase A based on methanol and  
27 mobile phase B on water with (a) or without (b) 0.1% FA added to A and B. For both the  
28 following gradient was used: 0-40 min, linear increase from 10 to 90% B; 40-43 min,  
29 90% B; 43-45 min, linear decrease from 90 to 10% B; and 45-55 min, 10% B. The flow  
30 rate was maintained at 0.2 mL/min and 254 nm was used as the detection wavelength.

31

32

33

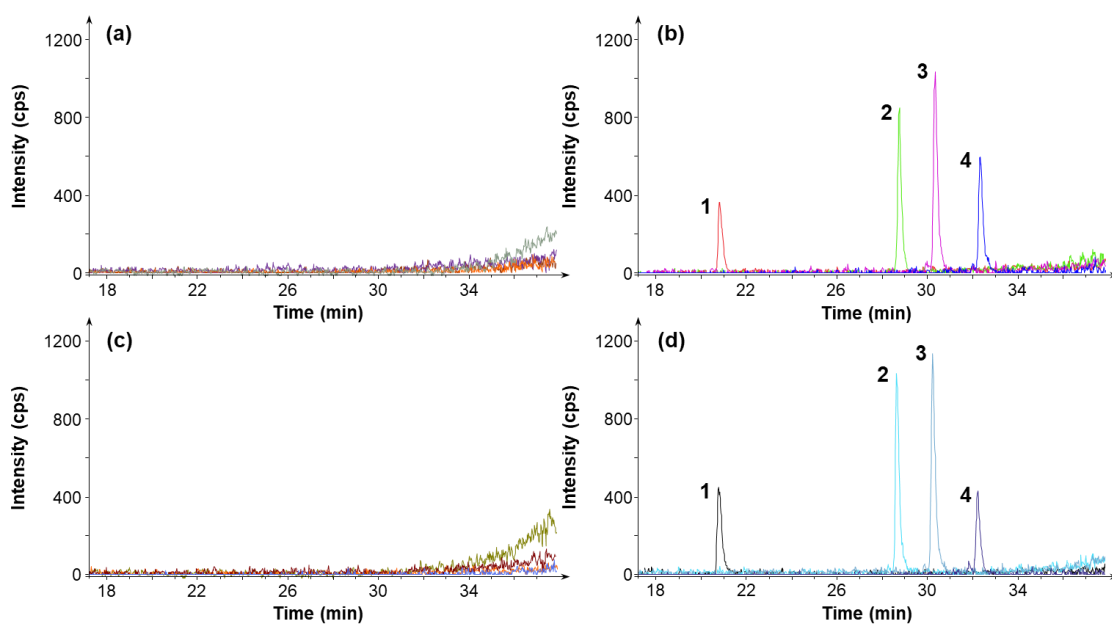

34

35 **Figure S2.** Chromatograms of (a) a solvent blank, (b) a mixture of **1–4** (1.0  $\mu\text{M}$  of each  
 36 complex), (c) a cell medium blank and (d) a cell medium sample spiked with a mixture  
 37 of **1–4** (1.0  $\mu\text{M}$  of each complex). The separations were conducted on an InertSustain<sup>®</sup>  
 38 C18 HP column. The following gradient was used: 0-40 min, linear increase from 10 to  
 39 90% B; 40-43 min, 90% B; 43-45 min, linear decrease from 90 to 10% B; and 45-55 min,  
 40 10% B. Mobile phase A: 0.1% FA in methanol; mobile phase B: 0.1% FA in water. The  
 41 flow rate was maintained at 0.2 mL/min and 254 nm was used as the detection wavelength.

42

43

44
